# Supplementary material for: Epigenetic and transcriptomic reprogramming in monocytes of severe COVID-19 patients reflects alterations in myeloid differentiation and the influence of inflammatory cytokines
Source: PubMed Central journal article supplement (PMC9706884; doi:10.1186/s13073-022-01137-4), 2022-11-29

Figure S1

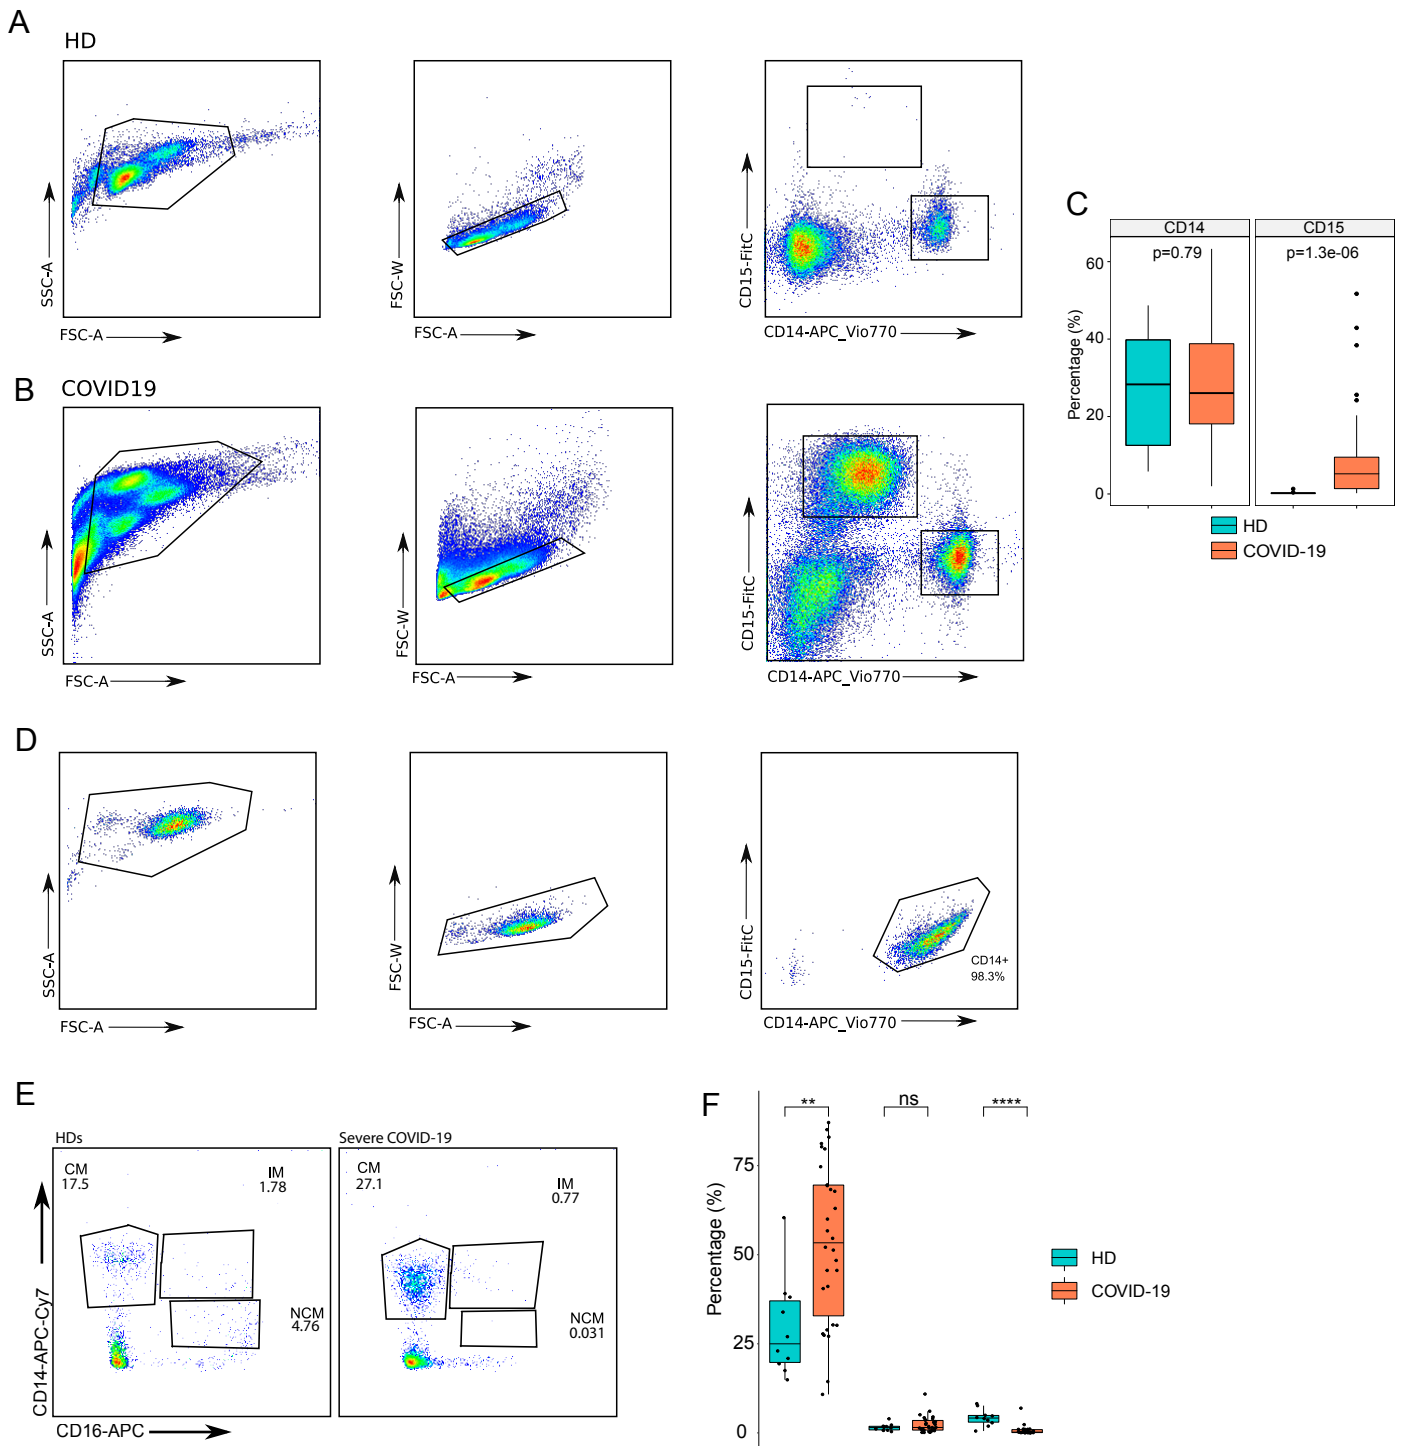

Supplement: 13073_2022_1137_MOESM4_ESM.pdf [file 13073_2022_1137_MOESM4_ESM.pdf]
